# Supplementary material for: Occupational Health and Safety Reporting in the Top 100 Australian Companies: Does Organisational Risk Profile Matter?
Source: MDPI journal article supplement (doi:10.3390/admsci14040072), 2024-04-07
Supplement: s1 [file s1]

| National Action Areas                         | Key Factors                                                            | 0                                  | 1                                                                                                                                                        | 2                                                                                                                                                     | 3                                                                                                                                                                         | 4                                                                                                                                                                                                                                                      | 5                                                                                                                                                                                                                                                               |
|-----------------------------------------------|------------------------------------------------------------------------|------------------------------------|----------------------------------------------------------------------------------------------------------------------------------------------------------|-------------------------------------------------------------------------------------------------------------------------------------------------------|---------------------------------------------------------------------------------------------------------------------------------------------------------------------------|--------------------------------------------------------------------------------------------------------------------------------------------------------------------------------------------------------------------------------------------------------|-----------------------------------------------------------------------------------------------------------------------------------------------------------------------------------------------------------------------------------------------------------------|
| Healthy and safe by design                    | Health, safety and hazard information                                  | No reference to or acknowledgement | Covered in principle but not effectively addressed <ul style="list-style-type: none"> <li>Some mention of safety or health</li> </ul>                    | Only implicitly covered <ul style="list-style-type: none"> <li>A discussion small discussion on safety goals or programs within the report</li> </ul> | Partial acknowledgement or coverage <ul style="list-style-type: none"> <li>Wellbeing programs in general, however not linked to specific reasons for employees</li> </ul> | Sufficient coverage but lack of definitions or specificity <ul style="list-style-type: none"> <li>Within company goals</li> <li>Wellbeing programs in general, however linked to specific reasons for employees and company identified risk</li> </ul> | Comprehensively covered <ul style="list-style-type: none"> <li>Within company goals</li> <li>Discussions of health and safety built into everyday activities</li> <li>Comprehensive programs and explanations of program which are diverse in nature</li> </ul> |
| Responsive and effective regulatory framework | Health and safety obligations being met under legislation and practice | No reference to or acknowledgement | Covered in principle but not effectively addressed <ul style="list-style-type: none"> <li>Workers compensation statistics, with no discussion</li> </ul> | Only implicitly covered <ul style="list-style-type: none"> <li>A few lines regarding explanation in statistics along with the statistics</li> </ul>   | Partial acknowledgement or coverage <ul style="list-style-type: none"> <li>Discussion regarding changes between years and possible differences between years</li> </ul>   | Sufficient coverage but lack of definitions or specificity <ul style="list-style-type: none"> <li>Small explanation behind the statistics and methods or</li> </ul>                                                                                    | Comprehensively covered <ul style="list-style-type: none"> <li>Workers compensation statistics with a discussion on reason, changes or process development</li> </ul>                                                                                           |

|                                |                                                               |                                    |                                                                                                                                                                                        |                                                                                                                                                                                 |                                                                                                                                                                                              |                                                                                                                                                                                                         |                                                                                                                                                                                                                                                                 |
|--------------------------------|---------------------------------------------------------------|------------------------------------|----------------------------------------------------------------------------------------------------------------------------------------------------------------------------------------|---------------------------------------------------------------------------------------------------------------------------------------------------------------------------------|----------------------------------------------------------------------------------------------------------------------------------------------------------------------------------------------|---------------------------------------------------------------------------------------------------------------------------------------------------------------------------------------------------------|-----------------------------------------------------------------------------------------------------------------------------------------------------------------------------------------------------------------------------------------------------------------|
|                                |                                                               |                                    |                                                                                                                                                                                        |                                                                                                                                                                                 |                                                                                                                                                                                              | goals setting for the following year.                                                                                                                                                                   | <ul style="list-style-type: none"> <li>Fines and audits complete discussion on reason behind ratings</li> </ul>                                                                                                                                                 |
| Leadership and culture         | Leadership and communication of health and safety information | No reference to or acknowledgement | Covered in principle but not effectively addressed <ul style="list-style-type: none"> <li>Mention of training requirements</li> <li>Mention about safety in Board descripts</li> </ul> | Only implicitly covered <ul style="list-style-type: none"> <li>General leadership training programs. No discussion on safety or employee health in program mentioned</li> </ul> | Partial acknowledgement or coverage <ul style="list-style-type: none"> <li>Some discussion on leadership training and safety as one of the topics that leaders review.</li> </ul>            | Sufficient coverage but lack of definitions or specificity <ul style="list-style-type: none"> <li>Leadership forums on risk/ safety but no discussion of leaders completing risk assessments</li> </ul> | Comprehensively covered <ul style="list-style-type: none"> <li>Leadership completing risk assessments and training/ attend global best practice training on risk. Implementation of risk training</li> <li>Review and change of leadership practices</li> </ul> |
| Health and safety capabilities | Work related health disorders, education and outcomes         | No reference to or acknowledgement | Covered in principle but not effectively addressed <ul style="list-style-type: none"> <li>Mention of a specific concern no details.</li> </ul>                                         | Only implicitly covered <ul style="list-style-type: none"> <li>Mention of concern with statistics or basic information</li> </ul>                                               | Partial acknowledgement or coverage <ul style="list-style-type: none"> <li>General wellness programs completed around health and safety concern</li> <li>A few actions or targets</li> </ul> | Sufficient coverage but lack of definitions or specificity <ul style="list-style-type: none"> <li>Specific health risks given a general overview</li> </ul>                                             | Comprehensively covered <ul style="list-style-type: none"> <li>Specific discussion on health risks for employees within the business. Methods of improvement, treatment and</li> </ul>                                                                          |

|                         |                                                                                       |                                    |                                                                                                                                           |                                                                                                                                                                                                                 |                                                                                                                                                                            |                                                                                                                                                                             |                                                                                                                                                                      |
|-------------------------|---------------------------------------------------------------------------------------|------------------------------------|-------------------------------------------------------------------------------------------------------------------------------------------|-----------------------------------------------------------------------------------------------------------------------------------------------------------------------------------------------------------------|----------------------------------------------------------------------------------------------------------------------------------------------------------------------------|-----------------------------------------------------------------------------------------------------------------------------------------------------------------------------|----------------------------------------------------------------------------------------------------------------------------------------------------------------------|
|                         |                                                                                       |                                    |                                                                                                                                           |                                                                                                                                                                                                                 |                                                                                                                                                                            |                                                                                                                                                                             | ongoing future planning                                                                                                                                              |
| Research and evaluation | Preventive actions regarding health and safety, as well as, evidence of best practice | No reference to or acknowledgement | Covered in principle but not effectively addressed <ul style="list-style-type: none"> <li>Different programs used for training</li> </ul> | Only implicitly covered <ul style="list-style-type: none"> <li>General overall strategy used such as United Nations Sustainable Development Goals, however little evidence of health safety evidence</li> </ul> | Partial acknowledgement or coverage <ul style="list-style-type: none"> <li>Strategy for programs used</li> <li>Discussion of programs and reasoning of training</li> </ul> | Sufficient coverage but lack of definitions or specificity <ul style="list-style-type: none"> <li>Relating strategy to each area, goal and aspect of the company</li> </ul> | Comprehensively covered <ul style="list-style-type: none"> <li>Working with research agency or external providers to ensure ongoing evidence for practice</li> </ul> |

| Company:<br>Industry:<br>Report type:<br>Link for report:              |                                                                                                                                                                                                                                                                                                                                                                                                                                                |                         |       |
|------------------------------------------------------------------------|------------------------------------------------------------------------------------------------------------------------------------------------------------------------------------------------------------------------------------------------------------------------------------------------------------------------------------------------------------------------------------------------------------------------------------------------|-------------------------|-------|
| Key Factors                                                            | Information outline (taken directly from the Australian Work Health and Safety Strategy)                                                                                                                                                                                                                                                                                                                                                       | Comments (page numbers) | Score |
| Health, safety and hazard information                                  | <ul style="list-style-type: none"> <li>Workers' general health and wellbeing are strongly influenced by their health and safety at work.</li> <li>Structures, plant and substances are designed to eliminate or minimise hazards and risks before they are introduced into the workplace.</li> <li>Work, work processes and systems of work are designed and managed to eliminate or minimise hazards and risks.</li> </ul>                    |                         |       |
| Health and safety obligations being met under legislation and practice | <ul style="list-style-type: none"> <li>An effective regulatory framework provides for a flexible response taking into account the particular circumstances, available evidence, community expectations and the environment in which organisations operate.</li> <li>Legislation, policies and practice are reviewed, monitored and updated regularly to continue progress towards national consistency and regulatory effectiveness</li> </ul> |                         |       |
| Leadership and communication of health and safety information          | <ul style="list-style-type: none"> <li>systematic management of risks</li> <li>role clarity, worker involvement and workgroup cohesion</li> <li>consultation and clear two-way communication</li> <li>compliance with procedures</li> </ul>                                                                                                                                                                                                    |                         |       |

|                                                                                       |                                                                                                                                                                                                                                                                                                                                                                                                                                       |  |  |
|---------------------------------------------------------------------------------------|---------------------------------------------------------------------------------------------------------------------------------------------------------------------------------------------------------------------------------------------------------------------------------------------------------------------------------------------------------------------------------------------------------------------------------------|--|--|
| Work related health disorders, education and outcomes                                 | <ul style="list-style-type: none"> <li>• In the workplace those in control of work need to be able to make informed decisions.</li> <li>• Managers need to be able to identify hazards and understand how to manage associated work health and safety risks, judge whether controls are effective and communicate with staff.</li> <li>• Everyone in a workplace has the work health and safety capabilities they require.</li> </ul> |  |  |
| Preventive actions regarding health and safety, as well as, evidence of best practice | <ul style="list-style-type: none"> <li>• Work health and safety policy, programs and practice need to be informed by robust evidence</li> <li>• Continuing to improve national data is essential to developing the evidence base</li> </ul>                                                                                                                                                                                           |  |  |
