# Supplementary material for: Occupational Health and Safety Reporting in the Top 100 Australian Companies: Does Organisational Risk Profile Matter?
Source: MDPI journal article supplement (doi:10.3390/admsci14040072), 2024-04-07
Supplement: s1 [file s1]

Archive with 1 entries (1 files):
- admsci-2917328-supplementary.pdf
